# seg-metrics: a Python package to compute segmentation metrics

Jingnan Jia<sup>1</sup>, Marius Staring<sup>1</sup>, and Berend C. Stoel<sup>1,\*</sup>

<sup>1</sup>Division of Image Processing, Department of Radiology, Leiden University Medical Center, 2300RC, the Netherlands

## Abstract

Medical image segmentation (MIS) is an important task in medical image processing. Unfortunately, there is not a out-of-the-box python package for the evaluation metrics of MIS. Therefore, we developed `seg-metrics`, an open-source Python package for MIS model evaluation. Unlike existing packages, `seg-metrics` offers user-friendly interfaces for various overlap-based and distance-based metrics, providing a comprehensive solution. `seg-metrics` supports multiple file formats and is easily installable through the Python Package Index (PyPI). With a focus on speed and convenience, `seg-metrics` stands as a valuable tool for efficient MIS model assessment.

## 1 Background

In the last decade, the research of artificial intelligence on medical images has attracted researchers' interest. One of the most popular directions is automated medical image segmentation (MIS) using deep learning, which aims to automatically assign labels to pixels so that the pixels with the same label form a segmented object. However, in the past years a strong trend of highlighting or cherry-picking improper metrics to show particularly high scores close to 100% was revealed in scientific publishing of MIS studies [1]. In addition, even though there are some papers that evaluate image segmentation results from different perspectives, the implementation of their evaluation algorithms is inconsistent. This is due to the lack of a universal metric library in Python for standardized and reproducible evaluation. Therefore, we proposed to develop an open-source publicly available Python package `seg-metrics`, which aims to evaluate the performance of MIS models. Our package is public available at <https://pypi.org/project/seg-metrics>.

## 2 Related packages

As far as we know, until the publication date of this package (2020), there are only two open source packages which could perform MIS metrics calculation: `SimpleITK`[2] and `Medpy` [3].

`SimpleITK` is an interface (including Python, c#, Java, and R) to the Insight Segmentation and Registration Toolkit (ITK) designed for biomedical image analysis. Unfortunately, `SimpleITK` does not support the evaluation of MIS directly. Each evaluation consists of

Table 1: Confusion matrix (adopted from [https://en.wikipedia.org/wiki/Confusion\\_matrix](https://en.wikipedia.org/wiki/Confusion_matrix))

| Total (P+N) |              | Prediction   |              |
|-------------|--------------|--------------|--------------|
|             |              | Positive (P) | Negative (N) |
| Reference   | Positive (P) | TP           | FN           |
|             | Negative (N) | FP           | TN           |

several basic steps, which makes it not user-friendly. **Medpy** is a medical image processing library written in Python. It includes some functions to evaluate MIS. However, it mainly support the operations of binary segmentation results, which limits its wider application scenarios. Therefore, this work aims to develop a Python package specifically for MIS.

### 3 Our seg-metrics package

Our **seg-metrics** package supports calculating different evaluation metrics directly in one line of code. The metrics could be divided to overlap-based metrics and distance-based metrics. Overlap-based metrics, define the overlap between the reference annotation and the prediction of the algorithm. It is typically complemented by a distance-based metrics, which could explicitly assess how close the boundaries are between the prediction and the reference [4]. The details of the two categories are described below.

#### 3.1 Overlap-based metrics

A confusion matrix (see Table 1) could be derived when comparing a segmentation (pixel-wise classification) result and its reference. In this table, there are 4 different outcomes:

1. **TP**: If the actual classification is positive and the predicted classification is positive, this is called a true positive (TP) result because the positive sample was predicted correctly.
2. **FN**: If the actual classification is positive and the predicted classification is negative, this is called a false negative (FN) result because the positive sample is incorrectly predicted as being negative.
3. **FP**: If the actual classification is negative and the predicted classification is positive, this is called a false positive (FP) result because the negative sample is incorrectly predicted as being positive.
4. **TN**: If the actual classification is negative and the predicted classification is negative, this is called a true negative (TN) result because the negative sample is predicted correctly.

Based on these four outcomes, we can derive a great number of overlap-based metrics. Their equations are as follows.

- **Dice Coefficient (F1-Score)**

$$Dice = \frac{2 \times |A \cap B|}{|A| + |B|} = \frac{2 \times TP}{2 \times TP + FP + FN} \quad (1)$$

- **Jaccard index**

$$Jaccard = \frac{|A \cap B|}{|A \cup B|} = \frac{TP}{TP + FP + FN} \quad (2)$$

- **Precision/Positive predictive value (PPV)**

Precision score is the number of true positive results divided by the number of all positive results

$$Precision = \frac{TP}{TP + FP} \quad (3)$$

- **Selectivity/Specificity/True negative rate (TNR)**

$$TNR = Specificity = \frac{TN}{TN + FP} \quad (4)$$

- **False negative rate (FNR)**

$$FNR = \frac{FN}{TN + FP} \quad (5)$$

- **Recall/Sensitivity/Hit rate/True positive rate (TPR)**

Recall score, also known as Sensitivity, hit rate, or TPR, is the number of true positive results divided by the number of all samples that should have been identified as positive

$$TPR = Sensitivity = \frac{TP}{TP + FN} \quad (6)$$

- **False positive rate (FPR)**

$$FPR = \frac{FP}{TP + FN} \quad (7)$$

- **Accuracy/Rand Index**

Accuracy score, also known as Rand index is the number of correct predictions, consisting of correct positive and negative predictions divided by the total number of predictions.

$$Accuracy = \frac{TP + TN}{TP + FP + FN + TN} \quad (8)$$

- **Volume similarity** Volume similarity measures the absolute size difference of the regions, as a fraction of the size of the sum of reference and segmentation result. There is more than one definitions for the volume similarity [5].

1. The first definition is [5]:

$$VS = 1 - \frac{|V_{pred} - V_{gdtH}|}{V_{pred} + V_{gdtH}} \quad (9)$$

where  $V_{pred}$  is the volume of prediction and  $V_{gdt}$  is the volume of the ground truth. It ranges from 0 to 1. Higher value means the size (volume) of the prediction is more similar (close) with the size (volume) of the ground truth.

2. The second definition is:

$$VS = \frac{2 \times (V_{pred} - V_{gdt})}{V_{pred} + V_{gdt}} \quad (10)$$

This definition is from the official tutorial of `SimpleITK` [6]. Negative VS means the volume of prediction is less than the volume of ground truth, which is called **underestimation**. Positive VS means the volume of prediction is greater than the volume of the ground truth, which is called **overestimation**.

In our package `seg_metrics`, we implemented the **second** definition. Please note that none of the two equations represent overlap information. VS only represents the volume size difference between prediction and ground truth.

### 3.2 Distance-based metrics

- **Hausdorff distance (HD)** (see Figure 1)

$$HD = \max \left\{ \sup_{a \in A} \inf_{b \in B} d(a, b), \sup_{b \in B} \inf_{a \in A} d(b, a) \right\} \quad (11)$$

where *sup* represents the supremum operator, *inf* is the infimum operator, and  $\inf_{b \in B} d(a, b)$  quantifies the distance from a point  $a \in X$  to the subset  $B \subseteq X$ .

- **Hausdorff distance 95% percentile (HD95)** is the 95% percentile of surface distances between segmentation and reference.
- **Mean (Average) surface distance (MSD)** is the mean value of surface distances between segmentation and reference [7, 8].
- **Median surface distance (MDS)** is the median value of surface distances between segmentation and reference.

**Note:** These metrics are **symmetric**, which means the distance from segmentation result to reference is the same as the distance from reference to segmentation result.

## 4 Installation

Our package was published in the Python Package Index (PyPI), which is the official third-party software repository for Python. Thus, `seg_metrics` can be directly installed and immediately used in any Python environment using a single line as follows.

```
$ pip install seg-metrics
```

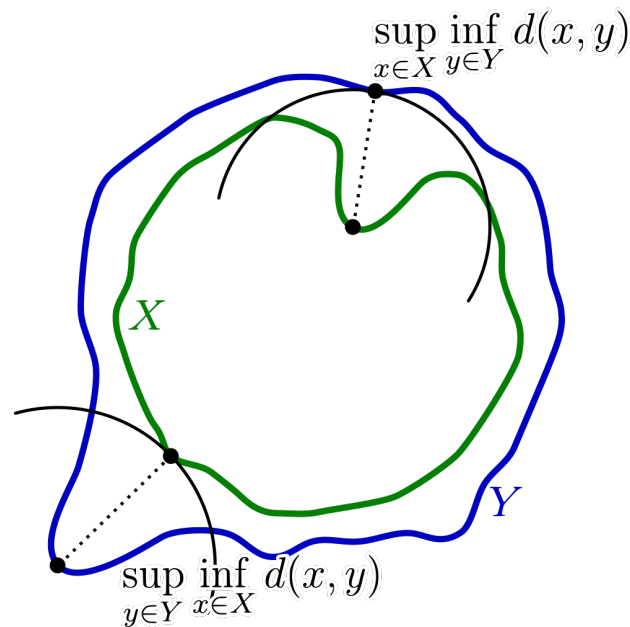

Figure 1: Hausdorff distance between the green curve X and the blue curve Y.

## 5 Use cases

`seg-metrics` is a Python package which outputs the segmentation metrics by receiving one ground truth image and another predicted image. After we import the package by `from seg_metrics import seg_metrics`, the syntax to use it is as follow (**Note:** all the following cases are based on `textttseg-metrics 1.1.6`).

```
from seg_metrics.seg_metrics import write_metrics
write_metrics(labels,
              gdth_path = None,
              pred_path = None,
              csv_file = None,
              gdth_img = None,
              pred_img = None,
              metrics = None,
              verbose = False,
              spacing = None,
              fully_connected = True,
              TPTNPFN = False)

""" Parameter description.
labels: a list of labels to perform the calculation of metrics.
gdth_path: a (sequence of) path of ground truth.
pred_path: a (sequence of) path of prediction.
csv_file: filename to save the metrics.
gdth_img: a (sequence of) ground truth.
```

```
pred_img: a (sequence of) prediction.  
metrics: metric names.  
verbose: whether to show the animated progress bar  
spacing: spacing of input images.  
fully_connected: whether to apply fully connected border.  
TPTNFPFN: whether to return the confusion matrix.  
  
return: A dict or a list of dicts which store metrics.  
"""
```

More examples are shown below.

- Evaluate two batches of images with same filenames from two different folders.

```
labels = [4, 5 ,6 ,7 , 8]  
gdth_path = 'data/gdth' # folder for ground truth images  
pred_path = 'data/pred' # folder for predicted images  
csv_file = 'metrics.csv' # file to save results  
  
metrics = sg.write_metrics(labels=labels,  
                           gdth_path=gdth_path,  
                           pred_path=pred_path,  
                           csv_file=csv_file)  
  
print(metrics)
```

- Evaluate two images

```
labels = [4, 5 ,6 ,7 , 8]  
gdth_file = 'data/gdth.mhd' # full path for ground truth image  
pred_file = 'data/pred.mhd' # full path for prediction image  
csv_file = 'metrics.csv'  
  
metrics = sg.write_metrics(labels=labels,  
                           gdth_path=gdth_file,  
                           pred_path=pred_file,  
                           csv_file=csv_file)
```

- Evaluate two images with specific metrics

```
labels = [0, 4, 5 ,6 ,7 , 8]  
gdth_file = 'data/gdth.mhd'  
pred_file = 'data/pred.mhd'  
csv_file = 'metrics.csv'  
  
metrics = sg.write_metrics(labels=labels[1:],  
                           gdth_path=gdth_file,  
                           pred_path=pred_file,
```

```
        csv_file=csv_file,
        metrics=['dice', 'hd'])
# for only one metric
metrics = sg.write_metrics(labels=labels[1:],
                           gdth_path=gdth_file,
                           pred_path=pred_file,
                           csv_file=csv_file,
                           metrics='msd')
```

- Select specific metrics. By passing the following parameters to select specific metrics.

```
# -----Overlap based metrics-----
- dice:      Dice (F-1)
- jaccard:   Jaccard
- precision: Precision
- recall:    Recall
- fpr:       False positive rate
- fnr:       False negative rate
- vs:        Volume similarity
# -----Distance based metrics-----
- hd:        Hausdorff distance
- hd95:      Hausdorff distance 95% percentile
- msd:       Mean (Average) surface distance
- mdsd:      Median surface distance
- stdsd:     Std surface distance
```

For example:

```
labels = [1]
gdth_file = 'data/gdth.mhd'
pred_file = 'data/pred.mhd'
csv_file = 'metrics.csv'

metrics = sg.write_metrics(labels, gdth_file, pred_file,
                           csv_file, metrics=['dice', 'hd95'])
dice = metrics['dice']
hd95 = metrics['hd95']
```

## 6 Comparison to other packages

medpy also provide functions to calculate metrics for medical images. Compared to it, our package `seg-metrics` has several advantages.

- **Faster.** `seg-metrics` is 5-10 times faster calculating distance based metrics (see Figure 2).

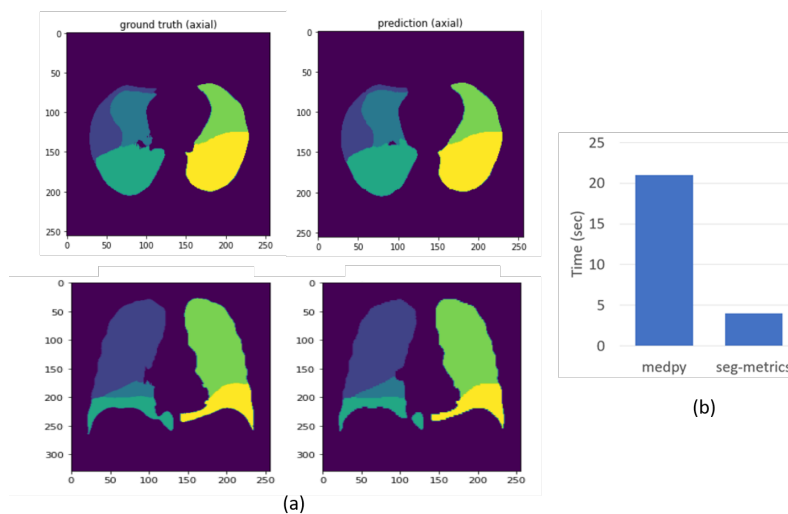

Figure 2: Performance comparison between `medpy` and `seg-metrics`. (a) Evaluated samples, a 3D lung lobe segmentation results (size:  $256 \times 256 \times 256$ ). Left: ground truth (manually annotated lobes), right: prediction (automatically predicted lobes). (b) Time comparison for the calculation of 'hd', 'hd95' and 'msd'.

- **More convenient.** `seg-metrics` can calculate all different metrics in once in one function (shown below)

```
gdth, pred = ..... # load two images
metrics = sg.write_metrics(labels=[1],
                           gdth_img=gdth,
                           pred_img=pred,
                           spacing=spacing,
                           metrics=['hd', 'hd95', 'msd']) # 3 outputs
```

while `medpy` needs to call different functions multiple times which cost more code and time, because the calculation of each 'hd', 'hd95', and 'msd' will always recalculate the distance map which cost much time.

```
hd = medpy.metric.binary.hd(result=pred, reference=gdth)
hd95 = medpy.metric.binary.hd95(result=pred, reference=gdth)
msd = medpy.metric.binary.asd(result=pred, reference=gdth)
```

- **More Powerful.** `seg-metrics` can calculate multi-label segmentation metrics and save results to .csv file in good manner, but `medpy` only provides **binary** segmentation metrics. For instance, if there are 5 labels for an image, our `seg-metrics` can calculate 5-label metrics by one-line command while `medpy` needs to at first convert 5-label image to five binary images, then calculate binary metrics one by one,



## 7 Limitation and future work

Because of time limitation for the development, there is still some space for package improvement.

- **Package name.** The package name is "seg-metrics" currently, as the abbreviation of "segmentation metrics". But the dash sign "-" in the name introduced some confusion during the installing and usage of the package. During the installation, `pip install seg-metrics` is used. However, users need to use it by `import seg_metrics`. The slight difference sometimes makes new users confused and easy to make mistakes. This issue is because Python's packaging system will automatically convert "\_" to "-" during the installing. Because "segmetrics" has been used by other products, we may consider changing the package name to "metricseg", "metricsrater", "imagesegmetrics", etc. to avoid such an issue in the future.
- **Supported file type.** Currently, the package supports most medical image formats with suffixes of `.mhd`, `.mha`, `.nii`, `.nii.gz`, `.nrrd`, etc. Because we receive some users' requests, we will support more image formats (e.g. `.png`, `.jpg`) in the future.
- **Usage guide.** Currently, we just list the usage of different metrics, but we did not explain when to use which metrics. In the future, we hope to release a tutorial to users with some examples to which metrics are preferable in different scenarios.

## 8 Availability and requirements

- **Project name:** seg-metrics
- **Project home page:** [https://github.com/Jingnan-Jia/segmentation\\_metrics](https://github.com/Jingnan-Jia/segmentation_metrics)
- **Operating system(s):** Platform independent
- **Programming language:** Python
- **License:** MIT license
- **Any restrictions to use by non-academics:** none

## Acknowledgments

This author was supported by the China Scholarship Council No.202007720110 during the development of this package.

## References

- [1] D. Müller, I. Soto-Rey, and F. Kramer. "Towards a guideline for evaluation metrics in medical image segmentation". In: *BMC Research Notes* 15.1 (2022), page 210.
- [2] B. C. Lowekamp, D. T. Chen, L. Ibáñez, and D. Blezek. "The design of SimpleITK". In: *Frontiers in neuroinformatics* 7 (2013), page 45.

- [3] *Medpy*. <https://pypi.org/project/MedPy/>. Accessed: 2015.
- [4] L. Maier-Hein, B. Menze, et al. “Metrics reloaded: Pitfalls and recommendations for image analysis validation”. In: *arXiv.org* 2206.01653 (2022).
- [5] A. A. Taha and A. Hanbury. “Metrics for evaluating 3D medical image segmentation: analysis, selection, and tool”. In: *BMC medical imaging* 15.1 (2015), pages 1–28.
- [6] *Segmentation Evaluation*. [http://insightsoftwareconsortium.github.io/SimpleITK-Notebooks/R\\_html/34\\_Segmentation\\_Evaluation.html](http://insightsoftwareconsortium.github.io/SimpleITK-Notebooks/R_html/34_Segmentation_Evaluation.html). Accessed: 2023-09-30.
- [7] T. Heimann, B. Van Ginneken, M. A. Styner, et al. “Comparison and evaluation of methods for liver segmentation from CT datasets”. In: *IEEE transactions on medical imaging* 28.8 (2009), pages 1251–1265.
- [8] V. Yeghiazaryan and I. Voiculescu. “Family of boundary overlap metrics for the evaluation of medical image segmentation”. In: *Journal of Medical Imaging* 5.1 (2018), pages 015006–015006.
